# Supplementary material for: Identification of two short peptide motifs from serine/arginine-rich protein ribonucleic acid recognition motif-1 domain acting as splicing regulators
Source: PeerJ. 2023 Sep 18;11:e16103. doi: 10.7717/peerj.16103 (PMC10512959; doi:10.7717/peerj.16103)
Supplement: Supplemental Information 2 [file peerj-11-16103-s002.xlsx]

## Sheet: Figure1
	Figure1 SMN1 in6
	T7-CP	T7-CP-SRSF1	T7-CP-SRSF5	T7-CP-SRSF6	T7-CP-SRSF9
	39	28	45	43	54
	31	24	51	39	56
	40	29	45	44	54
	40	23	46	45	62
	39	20	48	31	56
	33	19	49
P value		0.0002	0.0003	0.2741	<0.0001
	Figure1 SMN1 in7
	T7-CP	T7-CP-SRSF1	T7-CP-SRSF5	T7-CP-SRSF6	T7-CP-SRSF9
	99	97	97	97	98
	99	90	98	96	98
	98	93	94	98	97
	96	92	97
P value		0.0222	0.2283	0.3481	0.721
	Figure1 SMN2 in6
	T7-CP	T7-CP-SRSF1	T7-CP-SRSF5	T7-CP-SRSF6	T7-CP-SRSF9
	1	2	4	2	3
	1	1	5	1	4
	1	1	5	3	4
P value		0.3739	0.0004	0.1583	0.0013
	Figure1 SMN2 in7
	T7-CP	T7-CP-SRSF1	T7-CP-SRSF5	T7-CP-SRSF6	T7-CP-SRSF9
	40	31	48	54	40
	41	31	55	66	44
	40	26	50	61	38
	46	29	49	58	52
	45	31	53	65	52
P value		<0.0001	0.0016	<0.0001	0.4084

## Sheet: Figure2
		SRSF1 SMN1 in6
		T7-CP	T7-CP-SRSF1	RRM1	RRM2	Rs domain	RRM1/Gly rich	△Rs domain	Gly-rich/RRM2	△RRM1	RRM2/Rs domain
		40	23	51	64	25	41	45	29	16	26
		39	20	48	67	24	41	39	29	19	18
		33	19	43	61	25	40	38	35	18	10
		39	28
		31	24
		40	29
		P value	0.0002	0.0079	<0.0001	0.0012	0.1658	0.2257	0.0616	<0.0001	0.0017
		SRSF1 SMN2 in7
		T7-CP	T7-CP-SRSF1	RRM1	RRM2	Rs domain	RRM1/Gly rich	△Rs domain	Gly-rich/RRM2	△RRM1	RRM2/Rs domain
		46	29	20	37	34	70	35	9	20	10
		45	31	18	36	30	59	32	14	13	19
		40	31	17	32	40	65	29	11	12	19
		41	31
		40	26
		P value	<0.0001	<0.0001	0.0112	0.0299	0.0002	0.0028	<0.0001	<0.0001	<0.0001
		SRSF5 SMN1 in6
		T7-CP	T7-CP-SRSF5	RRM1	RRM2	Rs domain	RRM1/Gly rich	△Rs domain	Gly-rich/RRM2	△RRM1	RRM2/Rs domain
		38	48	96	64	21	76	86	46	20	30
		42	46	88	54	37	58	68	45	36	40
		39	49	94	56	33	67	78	48	32	38
		P value	0.0058	<0.0001	0.0003	0.0825	0.0002	<0.0001	0.0098	0.0563	0.4949
		SRSF5 SMN2 in7
		T7-CP	T7-CP-SRSF5	RRM1	RRM2	Rs domain	RRM1/Gly rich	△Rs domain	Gly-rich/RRM2	△RRM1	RRM2/Rs domain
		41	55	34	37	22	36	45	38	42	26
		45	53	20	25	12	28	43	25	46	18
		40	50	17	35	21	36	46	32	55	20
		P value	0.0072	0.0283	0.0737	0.0026	0.0478	0.2051	0.0634	0.2426	0.0019
		SRSF6 SMN1 in6
		T7-CP	T7-CP-SRSF6	RRM1	RRM2	Rs domain	RRM1/Gly rich	△Rs domain	Gly-rich/RRM2	△RRM1	RRM2/Rs domain
		41	45	53	73	34	38	49	47	36	54
		39	43	57	87	18	33	58	53	19	54
		31	39	56	82	26	30	53	50	25	53
		40	44
		P value	0.1068	0.0017	0.0002	0.0551	0.2755	0.0065	0.0104	0.076	0.0021
		SRSF6 SMN2 in7
		T7-CP	T7-CP-SRSF6	RRM1	RRM2	Rs domain	RRM1/Gly rich	△Rs domain	Gly-rich/RRM2	△RRM1	RRM2/Rs domain
		42	58	19	40	52	27	28	26	76	66
		45	65	17	45	53	24	31	28	80	61
		40	54	15	42	50	26	30	26	75	64
		41	66
		40	61
		P value	<0.0001	<0.0001	0.6685	0.0004	<0.0001	0.0001	<0.0001	<0.0001	<0.0001
		SRSF9 SMN1 in6
		T7-CP	T7-CP-SRSF9	RRM1	RRM2	Rs domain	RRM1/Gly rich	△Rs domain	Gly-rich/RRM2	△RRM1	RRM2/Rs domain
		39	62	38	87	41	23	50	30	56	85
		39	56	39	98	41	30	50	36	51	81
		39	54	36	92	47	28	54	33	53	83
		31	56
		40	54
		P value	<0.0001	0.9779	<0.0001	0.088	0.0076	0.0013	0.1214	0.0007	<0.0001
		SRSF9 SMN2 in7
		T7-CP	T7-CP-SRSF9	RRM1	RRM2	Rs domain	RRM1/Gly rich	△Rs domain	Gly-rich/RRM2	△RRM1	RRM2/Rs domain
		40	52	10	22	30	36	24	6	34	10
		43	52	24	14	43	45	37	15	44	23
		40	40	18	17	35	40	28	10	38	17
		41	44
		40	38
		P value	0.1802	0.0003	<0.0001	0.1457	0.8278	0.0087	<0.0001	0.3817	0.0001

## Sheet: Figure3
		3C
		T7-CP -SRSF1 RRM1	T7-CP -SRSF1 RRM1△9	T7-CP -SRSF1 RRM1△N	T7-CP -SRSF1 RRM1△N△9
		39	69	49	96
		27	74	48	96
		32	71	47	96
		P value	0.0005	P value	<0.0001
		3D
		T7-CP -SRSF9 RRM1	T7-CP -SRSF9 RRM1△9	T7-CP -SRSF9 RRM1△N	T7-CP -SRSF9 RRM1△N△9
		46	63	44	81
		49	72	45	90
		51	70	44	89
		P value	0.0031	P value	0.0001
		3E
	SRSF1	+N/RRM1	+N RRM1△C9	RRM1	RRM1△C9
		52	86	17	52
		44	84	17	47
		53	82	18	50
		P value	0.0004	P value	<0.0001
	SRSF9	+N/RRM1	+N RRM1△C9	RRM1	RRM1△C9
		19	78	9	44
		17	79	8	46
		16	79	9	47
		P value	<0.0001	P value	<0.0001
		3F
		T7-CP-SRSF1 RRM1	E→R	ALL R	R→E(1)	R→E(2)	R→E(3)	ALL E	ALL A
		26	21	51	21	59	67	81	85
		37	38	49	36	53	58	66	98
		34	33	54	30	60	68	72	90
		P value	0.7956	0.0061	0.5743	0.0032	0.0022	0.0017	0.0003
		T7-CP-SRSF9 RRM1	E→R	ALL R	R→E(1)	R→E(2)	R→E(3)	ALL E	ALL A
		35	50	84	71	84	90	91	93
		42	50	67	63	74	78	80	98
		44	61	78	76	88	91	81	95
		P value	0.0434	0.0032	0.0031	0.0011	0.0008	0.0006	<0.0001

## Sheet: Figure4
			T7-CP	T7-CP-SRSF5 RRM1	A	B	C	D	AB	ABC	BC	BCD	CD
			30	95	80	56	43	30	86	98	74	79	52
			34	96	80	64	44	34	89	97	77	83	58
			37	96	79	67	48	38	90	98	80	84	59
			P value	<0.0001	<0.0001	0.0018	0.0111	0.9188	<0.0001	<0.0001	<0.0001	<0.0001	0.0016
			T7-CP	T7-CP-SRSF6 RRM1	A	B	C	D	AB	ABC	BC	BCD	CD
			36	59	72	64	53	48	90	89	61	69	66
			35	72	80	74	57	48	95	94	68	77	78
			35	59	79	72	62	43	95	94	71	80	79
			P value	0.003	<0.0001	0.0004	0.0011	0.0029	<0.0001	<0.0001	0.0005	0.0003	0.0007

## Sheet: Figure5
		5a
		T7-CP	SRSF5 RRM1 A	△N2	△N4	△N6	△N8	△C2	△C4	△C6	△C8	△C9	△C10	△C11
		41	77	60	47	40	40	72	74	80	83	89	91	74
		47	82	66	46	39	38	79	80	85	83	87	88	79
		39	76	62	44	34	32	75	79	83	83	88	92	76
			81
			80
			P value	0.0002	<0.0001	<0.0001	<0.0001	0.1206	0.4836	0.1137	0.049	0.0015	0.0008	0.1768
		5b
		T7-CP	SRSF6 RRM1 A	△N2	△N4	△N6	△N8	△C2	△C4	△C6	△C8
		40	82	82	67	44	58	81	84	79	69
		42	83	79	67	49	61	82	82	79	70
		36	72	80	62	48	59	80	82	79	65
			P value	0.7314	0.0245	0.0011	0.0056	0.6041	0.363	>0.9999	0.0454
		5c
		T7-CP	CRVFIGRL	RVFIGRL	MPRVYIGRL	RVYIGRL		T7 CP	CRVFIGRL	RVFIGRL	MPRVYIGRL	RVYIGRL
		43	88	72	74	70		50	20	17	28	15
		47	91	68	69	65		52	18	17	29	19
		38	87	64	66	66		54	18	17	29	17
		47
		P value	<0.0001	0.0006	0.0005	0.0004		P value	<0.0001	<0.0001	<0.0001	<0.0001

## Sheet: Figure6
		SMN1
		Buffer	T7	T7 CP	CRVFIGRL	SRSF1 RRM1	SRSF1 RRM1 △C9
		96	99	98	93	97	97
		95	98	97	90	96	96
		97	95	92	82	94	97
				P value	0.1237	>0.9999	0.3486
		SMN2
		Buffer	T7	T7 CP	CRVFIGRL	SRSF1 RRM1	SRSF1 RRM1 △9AA
		52	54	60	18	53	69
		39	58	63	28	60	69
		62	59	64	22	60	77
				P value	0.0002	0.15	0.0168 (VS SRSF1 RRM1)
		MAPT
		Buffer	Empty vector	T7 CP	CRVFIGRL	CP SRSF1 RRM1	CP SRSF1 RRM1 △9AA
		34	52	35	11	12	20
		33	53	38	12	13	19
		43	53	43	17	12	22
				P value	0.0011	0.0004	0.0011 (VS SRSF1 RRM1)
		CASP3
		Buffer	T7	T7 CP	8AA	CP SRSF1 RRM1	CP SRSF1 RRM1 △9AA
		73	76	76	65	60	65
		72	75	74	63	58	64
		78	76	75	64	56	62
				P value	0.0002	0.0002	0.0175 (VS SRSF1 RRM1)
